# 1 **Auditory cortex encodes lipreading information through** 2 **spatially distributed activity**

3 Ganesan Karthik<sup>1</sup>, Cody Zhewei Cao<sup>1</sup>, Michael I. Demidenko<sup>1</sup>, Andrew Jahn<sup>1</sup>, William C.  
4 Stacey<sup>2</sup>, Vibhangini S. Wasade<sup>3,4</sup>, David Brang\*<sup>1</sup>

5 <sup>1</sup>Department of Psychology, University of Michigan, Ann Arbor, MI 48109

6 <sup>2</sup>Department of Neurology, University of Michigan, Ann Arbor, MI 48109

7 <sup>3</sup>Henry Ford Hospital, Detroit, MI 48202

8 <sup>4</sup>Department of Neurology, Wayne State University School of Medicine, MI 48201

9

10 **\*Corresponding Author:** [djbrang@umich.edu](mailto:djbrang@umich.edu)

11

## 12 **Data Availability Statement**

13 The data that support the findings of this study will be made openly available through the  
14 University of Michigan Deep Blue Repository.

15

## 16 **Conflict of Interest Statement**

17 The authors declare no competing financial interests.

18

## 19 **Acknowledgements**

20 This study was supported by NIH Grants R00DC013828 and R01NS094399. The authors report  
21 no conflicts of interest.

22

## 23 **Keywords**

24 Multisensory; Audiovisual; Speech; ECoG; iEEG; sEEG

## 25 **Summary**

26 Face-to-face communication improves the quality and accuracy of heard speech, particularly in  
27 noisy environments. Silent lipreading modulates activity in auditory regions, which has been  
28 hypothesized to reflect the transformation and encoding of multiple forms of visual speech  
29 information used to support hearing processes. Evidence suggests visual timing information as one  
30 such signal encoded in auditory areas: seeing when a speaker's lips come together between words  
31 can help listeners parse word-level boundaries. However, it remains unclear how lipreading alters  
32 activity in the auditory system to improve speech perception at the single word-level. Using fMRI  
33 and intracranial electrodes in patients, here we show that silently lipread words can be classified  
34 from neural activity in auditory areas based on distributed spatial information. Lipread words  
35 evoked similar representations to the corresponding heard words, consistent with the prediction  
36 that automatic lipreading refines the tuning of auditory representations. Similar to heard words,  
37 lipread words varied in the distinctiveness of their neural representations in auditory cortex: e.g.,  
38 the lipread words DIG and GIG evoked more similar neural activity in auditory cortex relative to  
39 the more perceptually distinct word FIG, suggesting that lipreading activity reflects probabilistic  
40 distributions as opposed to the unique identity of the lipread word. Notably, while visual speech  
41 has both excitatory and suppressive effects on auditory firing rates, classification was observed in  
42 both neural populations, consistent with the prediction that lipreading contributes to phoneme  
43 population tuning by both activating the corresponding representation and suppressing incorrect  
44 phonemic representations. These results support a model in which the auditory system combines  
45 the joint neural distributions evoked by heard and lipread words to generate a more precise estimate  
46 of what was said, particularly during noisy speech.

## 47 **Introduction**

48 Visual speech improves auditory speech perception during face-to-face conversations<sup>1,2</sup>.  
49 These benefits are strongest in noisy situations<sup>3</sup> and in individuals with hearing loss due to healthy  
50 aging<sup>4</sup>, intrinsic brain tumor<sup>5</sup>, stroke<sup>6,7</sup>, concussion<sup>8,9</sup>, or cochlear implants<sup>10</sup>. However, there  
51 remains limited understanding of how the brain enables vision to facilitate hearing processes.

52 The ability to extract useful information from visual speech signals (e.g., lipreading) is an  
53 implicit behavior that is rooted in the statistical relationship between auditory and visual cues in  
54 the natural environment<sup>11</sup>. Lip dynamics are strongly correlated with different features of speech  
55 including temporal information (onset of words, rate of speech, and the boundaries between words)  
56 and relative spectral pitch based on the acoustics of the oral cavity<sup>1</sup>. Most recognizably, the shape  
57 of the lips during speech is reliably associated with corresponding speech sounds<sup>12</sup>; these simple  
58 lip shapes are described as visemes and are analogous to phonemes in the auditory domain (basic  
59 units of speech sounds).

60 Research has demonstrated that silent visual speech (e.g., lipreading) evokes activity within  
61 the auditory system<sup>13,14</sup>. Indeed, intracranial electroencephalography (iEEG) recordings indicate  
62 that visual speech influences processing in auditory regions through multiple temporal, spectral,  
63 and spatial configurations<sup>15</sup>. While these findings highlight the broad effect of visual information  
64 on auditory speech processing, differences in activity do not provide a mechanistic account for  
65 how visual speech signals integrate with auditory neuronal populations. Best understood among  
66 these mechanisms is how visual timing information during continuous speech biases auditory  
67 timing through phase-resetting mechanisms<sup>16,17</sup>. However, it remains unclear how lipreading  
68 information (visemes) is transformed into a signal used by the auditory system.

69           Within the auditory domain, phonetic and phonemic features are encoded by local and  
70 distributed populations of neurons, respectively<sup>18</sup>. Mesgarani and colleagues<sup>18</sup> used human iEEG  
71 recorded from high-density electrodes to demonstrate that phonemes are represented by distributed  
72 populations of neurons in the STG. Combined with past research, these data support a model in  
73 which the STG contains a patchy distribution of neurons that are tuned to specific phonetic features  
74 via their spectro-temporal profiles<sup>18,19</sup>. For example, research has reported spatially distinct  
75 responses in these regions to spectrally similar phonemes such as /ba/ and /da/<sup>19-21</sup>, and clustered  
76 activities across a large phoneme-space (e.g., the distributed pattern of activity to /ma/ is more  
77 similar to /na/ than it is to the spectro-temporally distinct phoneme /ba/<sup>18</sup>. Indeed, the identities of  
78 different heard phonemes can be decoded by the distribution of activity in the auditory cortex<sup>22</sup>,  
79 even when the physical auditory stimulus remains the same.

80           Building on this understanding of auditory perception, we proposed that activity from  
81 lipread visemes is relayed from visual regions to auditory cortex, preferentially modulating the  
82 same populations of neurons that encode matching phoneme responses<sup>15</sup>. In this hypothesis, heard  
83 and lipread activations in auditory cortex are combined through a winner-take-all mechanism, in  
84 which the phoneme population with highest activation profile leads to the phoneme that is  
85 perceived<sup>23</sup>.

86           Here we test the hypothesis that the identities of individual visemes are represented in the  
87 auditory system through distributed patterns of activation, and these spatial distributions match  
88 corresponding phoneme representations. Auditory cortex activation magnitude and informational  
89 content were examined using functional magnetic resonance imaging (fMRI) in healthy  
90 individuals and iEEG recordings in patients with epilepsy during word perception tasks, in which  
91 patients either saw the lip movements or heard the speech sounds for the same groups of words.



92 The identities of the different words were classified from fMRI and iEEG signals in auditory cortex  
93 using support vector machines (SVMs). Results demonstrate that the auditory system reliably  
94 encodes the identity of visemes using spatially distributed activity in a similar manner to heard  
95 words. Moreover, visemes evoked spatially similar activity to matching phonemes, consistent with  
96 the hypothesis that visual speech targets corresponding phoneme representations

97

## 98 **Results**

### 99 *fMRI Experiment*

100 In Experiment 1 we presented subjects ( $n = 64$ ) with consonant vowel (CV) syllables while  
101 fMRI activity was acquired. Each trial included the silent video or auditory stimulus taken from a  
102 speaker producing the CVs /mama/, /fafa/, or /kaka/ (Fig. 1a). Stimuli were presented using an  
103 optimized event-related design (pre-registered at OSF: <https://osf.io/6fzwd/>) and data were  
104 analyzed using univariate and decoding approaches to examine the activation and information  
105 present in heard and lipread signals.

106 Mean behavioral accuracy was high in both conditions: 95.67% (SD = 3.01%) in the  
107 listening condition and 92.31% (SD = 3.72%) in the lipreading condition. As expected, the mean  
108 accuracy in the listening condition was significantly higher than the lipreading condition;  $t(63) =$   
109 6.57,  $p < 0.001$ , Cohen's  $d = 0.96$ . None of the 64 subjects performed below the pre-registered  
110 exclusion threshold (accuracy in either condition below 75%).

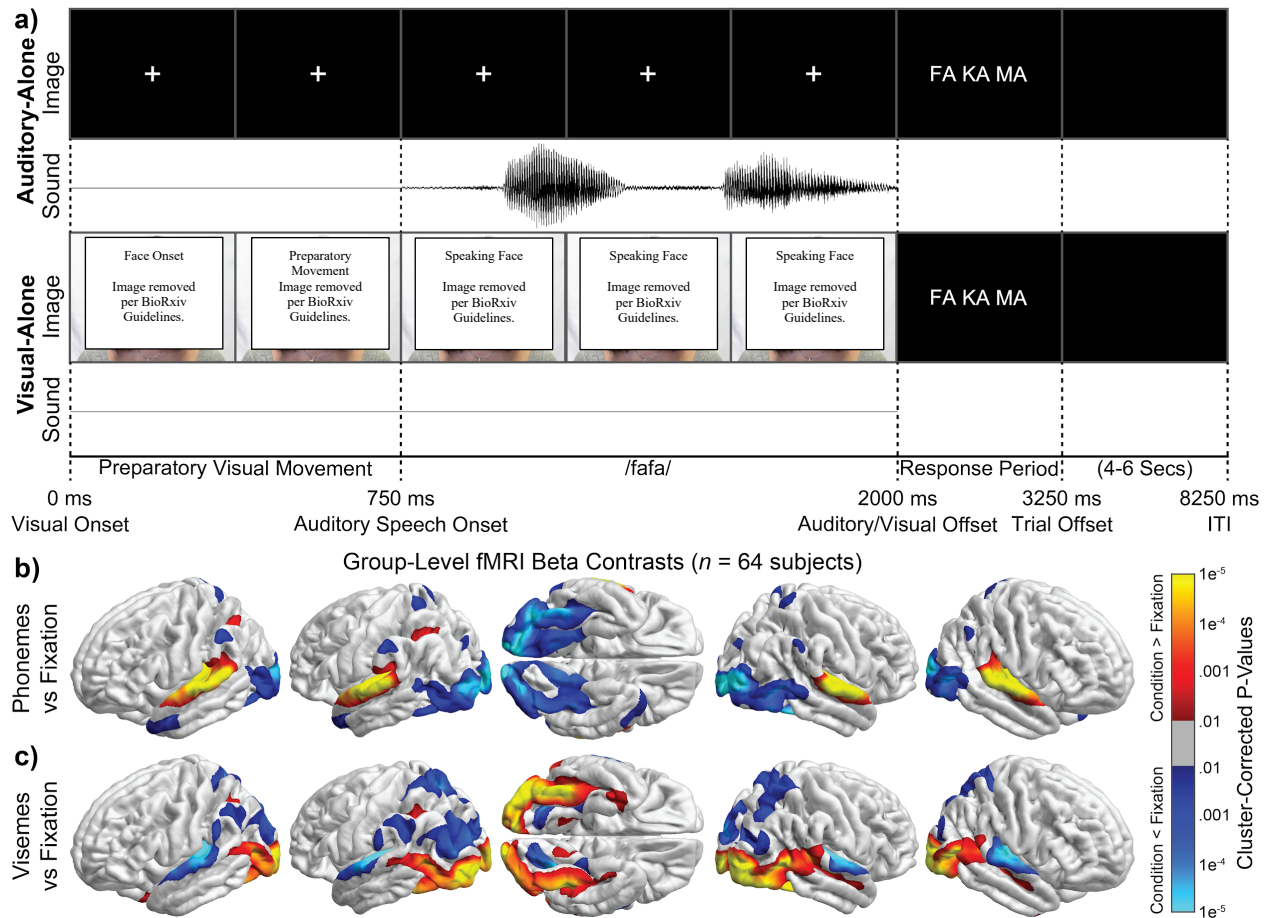

111

112 **Figure 1. fMRI task schematic and univariate activations.** (a) Schematic of auditory and visual trials. Auditory trials began with  
113 a fixation cross followed by a CV stimulus (either /mama/, /fafa/, or /kaka/). Visual trials presented the visual components of these  
114 same recordings without the corresponding audio track. After stimulus offset, subjects were cued to identify which of the three  
115 phonemes (or visemes) they saw (or heard) via button press. (b-c) Univariate group-level analyses of (b) phonemes vs fixation or  
116 (c) visemes vs fixation. Phonemes evoked maximally increased activity in the STG bilaterally. Visemes evoked increased activity  
117 within bilateral visual cortex, left pSTS, right MT, and posterior STG bilaterally, along with suppression through middle STG  
118 regions (including Heschl's gyrus). Colored regions reflect significant increases (red and yellow) or decreases (blues) in task-related  
119 activation (thresholded at  $p < .001$  and corrected for multiple comparisons using cluster-statistics).

120 Previous research demonstrated that silent lipreading modulates fMRI BOLD responses  
121 within auditory regions<sup>13</sup>. First, we replicated this finding using univariate contrasts in listening  
122 and lipreading conditions (phonemes vs fixation and visemes vs fixation, respectively). Results of  
123 the whole-brain analysis, corrected for multiple comparisons using cluster statistics (vertex-wise  
124 threshold of  $P < 0.001$ , cluster-corrected to  $P < 0.05$ ) are shown in Fig. 1b-c; full statistics for each  
125 analysis is reported in Supp. Tables 1 and 2 and beta estimates extracted from auditory and visual  
126 regions of interest (ROIs) are shown in Supp. Fig. 1. Phonemes elicited significantly increased

127 BOLD activity within the STG bilaterally and decreased BOLD within visual regions. Visemes  
128 similarly modulated activity broadly through the STG, with increased BOLD at the posterior STG  
129 and decreased BOLD in the middle to anterior STG, along with increased BOLD in visual regions.  
130 The finding that lipreading suppresses neural activity within portions of the auditory system is  
131 consistent with prior reports from fMRI<sup>24</sup> and iEEG<sup>25</sup>, which has been theorized to reflect the  
132 optimized tuning of neurons specialized for auditory speech<sup>26</sup>.

133 Univariate contrasts reveal activation magnitude but not informational content or  
134 representational structure. To examine whether visual speech is represented in the auditory system  
135 by distributed patterns of activity, we used multivariate pattern analysis (MVPA)<sup>27</sup> to classify  
136 individual phoneme and viseme labels. Previous decoding-based approaches using fMRI<sup>28,29</sup> and  
137 iEEG<sup>30,31</sup> demonstrated that speech patterns could be reconstructed from spatially distributed  
138 activity in auditory cortex.

139 Whole-brain searchlight-based MVPA was applied at the individual-subject level <sup>32</sup>  
140 conducted separately for each of the two conditions of interest (phonemes and visemes). Results  
141 of the whole-brain analysis, corrected for multiple comparisons using cluster statistics are shown  
142 in Figure 2 (vertex-wise threshold of  $P < 0.001$ , cluster-corrected to  $P < 0.05$ ); full statistics for  
143 each analysis is reported in Supp. Tables 3 and 4. In the auditory-only condition, peak decoding  
144 accuracy was observed bilaterally in the STG and pSTS. This is consistent with previous studies  
145 demonstrating phonetic representations in the STG using MVPA<sup>33</sup>. In the visual-only condition,  
146 peak decoding accuracy was observed within the STG bilaterally, the left pSTS, visual cortex  
147 bilaterally, and right hMT+.

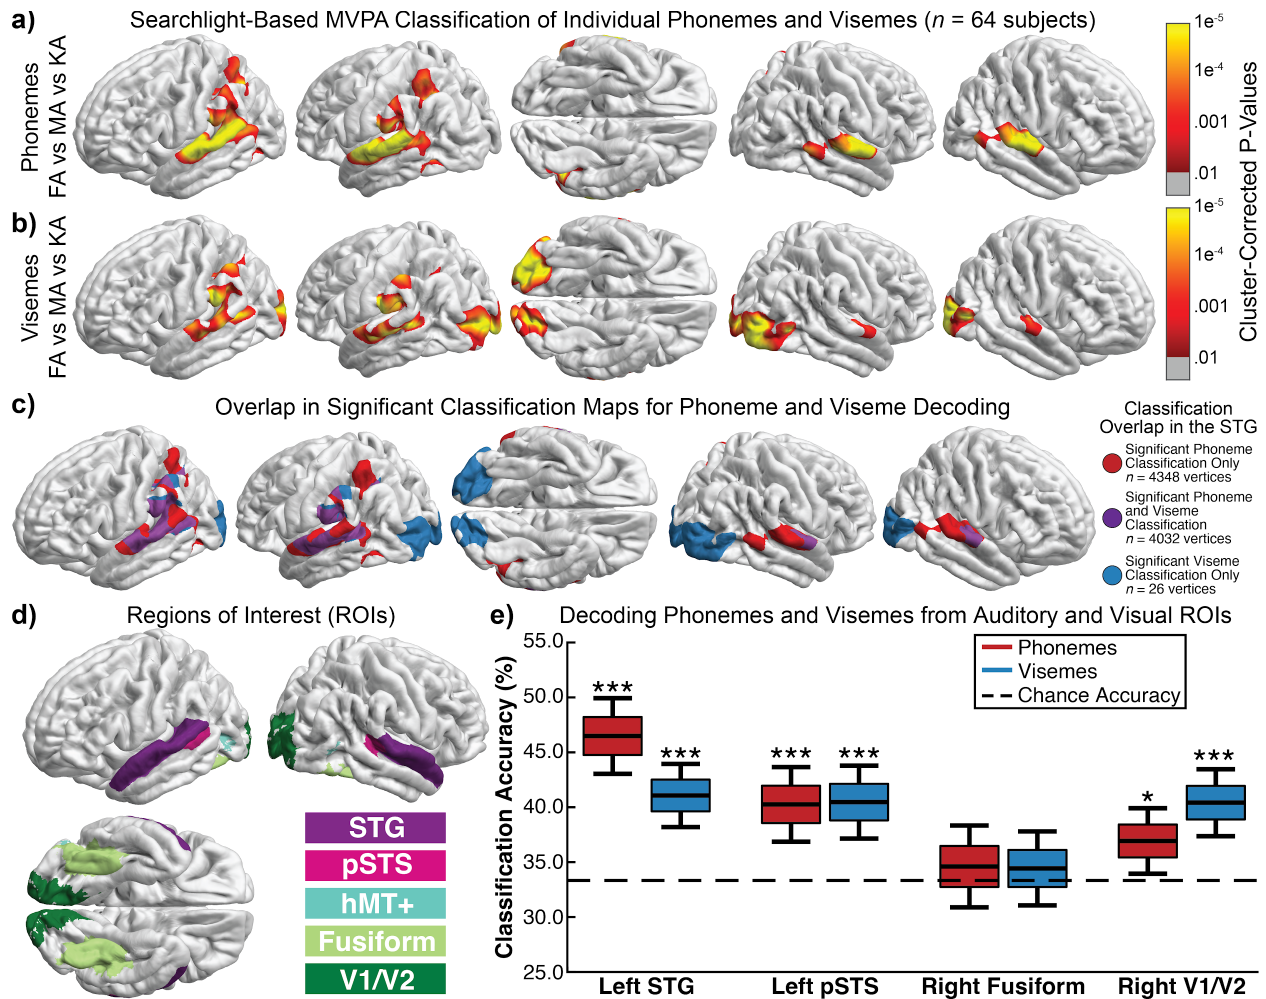

148

149 **Figure 2. fMRI decoding of phoneme and viseme information in an event-related design.** (a-c) Searchlight-based MVPA  
 150 classification in  $n = 64$  subjects. Classifiers were trained to identify (a) the phoneme heard (/fafa/, /mama/, or /kaka/) in the auditory-  
 151 only condition, (b) the viseme seen in the visual-only condition, or (c) condition differences between auditory-only and visual alone  
 152 trials. Decoding was conducted at the individual subject level and only group-level differences greater than chance (thresholded at  
 153  $p < .001$  and corrected for multiple comparisons using cluster-statistics) are shown. (a) Peak phoneme decoding was observed in the  
 154 bilateral STG. (b) Significant viseme decoding was observed in the bilateral STG, left pSTS, and visual regions. (c) Vertices with  
 155 significant classification of phonemes but not visemes (red), visemes but not phonemes (blue), or with significant classification of  
 156 both phonemes and visemes (purple). There is a large overlap in the vertices at which visemes and phonemes could be classified.  
 157 Restricted to the just the STG, vertices at which viseme classification was significant covered roughly half of the area in the STG  
 158 that phonemes were classified successfully at (48.1% overlap) with negligible area uniquely able to classify visemes. (d) Regions  
 159 of interest (ROIs) used for hypothesis driven classification at the single-subject level. (e) Results of classification at selected ROIs.  
 160 Phonemes were significantly classified from the left STG and pSTS. Visemes were significantly classified from the left STG  
 161 (consistent with the hypothesis that information about visemes is represented within the STG), pSTS, and visual cortex. Center line  
 162 reflects the mean, colored box SE, and the tails 95% confidence intervals. \* $p < .05$ , \*\*\* $p < .001$ . Chance accuracy is 33.3%.

163 To understand the spatial overlap of phoneme and viseme representations in the auditory  
 164 system we compared the spatial distribution of the classification maps. Results showed that a  
 165 majority of vertices contained either only phoneme information or both phoneme and viseme  
 166 information, with very few vertices representing viseme information alone. Across the left and

167 right STG, phonemes (but not visemes) were significantly classified at 27.2% of vertices, visemes  
168 (but not phonemes) were significantly classified at 0.16% of vertices, and phonemes and visemes  
169 were jointly classified from 25.2% of vertices. In total, phonemes were classified at twice as many  
170 vertices compared to visemes within the STG (52.4% vs 25.4%). Thus, STG classification was  
171 most prominent in vertices where lipreading produced BOLD suppression effects, consistent with  
172 predictions that lipreading regionally suppresses auditory activity to improve phoneme tuning  
173 responses.

174 To further quantify the relative information across target regions, we performed individual-  
175 subject SVM classification in five regions of interest (ROIs) in each hemisphere (dimension of  
176 vertices within the ROI; Fig. 2d). As shown in Fig 2e and Supp. Fig. 2 Phoneme classification  
177 accuracy was strongly above chance (33.3%) in the left and right STG, and the left pSTS (all  $p <$   
178  $.001$ ) with more moderate classification observed in the right pSTS, left and right hMT+, and left  
179 and right V1/V2 (all  $p < .05$ ). Viseme classification accuracy was strongly above chance in the left  
180 STG, left pSTS, and right V1/V2 (all  $p < .001$ ) with more moderate classification observed in the  
181 right STG, right hMT+, and left V1/V2 (all  $p < .05$ ).

182 The univariate analysis showed that visual speech modulated activity in auditory regions:  
183 visemes suppressed activity in the middle STG and increased activity in the posterior STG. Viseme  
184 decoding analyses identified above-chance classification accuracy broadly throughout the STG.  
185 Comparing the two results, the univariate visual-only analysis showed four times as many  
186 significant vertices in the STG (bilaterally) compared to the area with significant viseme  
187 classification in the MVPA analysis (64.3% vs 15.7% of STG vertices). This is consistent with the  
188 prediction that only a restricted proportion of the STG encodes visemic information, while other  
189 regions reflect domain general responses to the visual signals or the presentation of other visual



190 information (e.g., temporal or spectral information; <sup>1</sup>). To better understand the relationship  
191 between these results we compared areas of significant classification relative to areas of significant  
192 activity (either increased or decreased BOLD for visemes relative to fixation). Across the left and  
193 right STG, significant viseme classification was observed in 27.3% of vertices with decreased  
194 BOLD during the visual-only condition (relative to fixation). Conversely, significant viseme  
195 classification was observed in only 8.74% of vertices with increased BOLD during the visual-only  
196 condition. This is consistent with a model in which visemes activate the correct representation in  
197 a minority of vertices in the posterior STG and suppress incorrect representations throughout the  
198 STG broadly. In contrast, viseme classification within the left pSTS was present only within  
199 vertices that showed increased BOLD activation during lipreading (87.7% of vertices with a  
200 BOLD increase).

201         While the decoding analyses provide information about which regions of the brain encode  
202 the identities of individual phonemes and visemes, it is not possible to directly investigate  
203 similarities between how these phonemes and visemes are represented in these regions. For  
204 example, an examination of the spatial and temporal (dis)similarities for phonemes and visemes  
205 would aid in the interpretation of how visemic identities are transformed and encoded in the  
206 auditory regions. Using the same data as in the classification analysis, we separately averaged beta  
207 estimates for each phoneme and viseme and then compared the spatial distribution of activations  
208 at the individual subject level. We restricted vertices to those with significant classification in both  
209 auditory-only and visual-only conditions (purple vertices in Fig. 2c) within the STG and calculated  
210 the correlation between vertex-wise beta estimates for phoneme and viseme pairs. We averaged  
211 correlations across matching pairs (e.g., the phoneme /ma/ and the viseme /ma/) and separately  
212 mismatching pairs (e.g., the phoneme /ma/ and the visemes /ka/ and /fa/), then compared

213 correlations at the group level. Across subjects we observed a small but reliable increase in the  
214 correlation between associated phonemes and visemes compared to mismatched phonemes and  
215 visemes in the left STG,  $t(63) = 2.190$ ,  $p = .032$ ,  $d = 0.274$ , but not the right STG,  $t(63) = -0.026$ ,  
216  $p = .979$ ,  $d = -0.003$ . Repeating this analysis on all vertices within the anatomically defined STG  
217 ROI at the individual subject level, we observed a similar result,  $t(63) = 2.493$ ,  $p = .015$ ,  $d = 0.312$ .  
218 This result demonstrates that visemes evoke similar patterns of activity within the STG to those of  
219 phonemes. This is consistent with the prediction that automatic lipreading refines the tuning of  
220 auditory representations.

221

## 222 *iEEG Experiment*

223 Results from the fMRI study demonstrated that viseme information is represented in  
224 auditory areas. Moreover, because visemes were classified based on the spatial distribution of  
225 vertices in the STG, this supports a model in which lipreading is represented through population-  
226 coded responses in the auditory system, similar to the neural representation underlying phonemes  
227 <sup>18</sup>. However, the slow temporal dynamics of fMRI signals prevent a fine-grained analysis of the  
228 time-course of lipreading activation to examine when this information is available to the auditory  
229 system. Additionally, the use of only three dissimilar CV stimuli prevented a more graded analysis  
230 of these population-coded responses, such as whether more perceptually similar phonemes (e.g.,  
231 /ga/ and /da/) elicit more similar population-coded responses relative to perceptually distinct  
232 phonemes (e.g., /fa/ and /ba/). To answer both of these questions, next we collected data from a  
233 similar auditory-visual speech paradigm from  $n = 6$  patients with epilepsy who had electrodes  
234 implanted within auditory areas of the brain (Fig. 3a). Patients were presented with 240 auditory-  
235 only (listening) and 240 visual-only (lipreading) trials containing a single 1-2 syllable word. Each

236 word began with one of four consonants ('B', 'F', 'G', or 'D') to enable the decoding of distinct  
237 phonemic patterns. 40 distinct words were used (10 containing each of the 4 initial consonants;  
238 Supp. Table 5) and each word was repeated 6 times within each condition. On each trial subjects  
239 selected the initial consonant heard or seen from four options (4-alternative forced choice).  
240 Subjects' mean behavioral accuracy across listening and lipreading trials was significantly above  
241 chance (25%) at the group level: listening ( $M = .919$ ,  $SD = .081$ ,  $t(5) = 20.2$ ,  $p < .001$ ,  $d = 8.23$ ),  
242 lipreading ( $M = .674$ ,  $SD = .179$ ,  $t(5) = 5.78$ ,  $p = .002$ ,  $d = 2.36$ ). As expected, listening trials were  
243 correctly identified significantly more often than visual trials,  $t(5) = 5.93$ ,  $p = .002$ ,  $d = 2.42$ .

244 Words in both the auditory-only and visual-only conditions evoked activity broadly  
245 throughout the STG and MTG consistent with prior work<sup>15</sup>. Examining the spectral breakdown of  
246 these responses (Fig. 3b-d), phonemes evoked increased theta and high gamma power (HGp) and  
247 suppressed beta power following word onset. In natural speech, visual articulations typically occur  
248 before the onset of speech-related sounds (typically within 40 - 200 ms of speech onset<sup>34</sup>). Because  
249 of this pre-articulatory visual information, visemes evoked increased beta suppression beginning  
250 before the expected phoneme onset time, consistent with past research<sup>15</sup> and indicative of feedback  
251 inputs into the auditory system<sup>35,36</sup>. Additionally, visemes evoked more moderate changes in HGp  
252 following sound onset, even though no sound was present. Viseme-related HGp increases were  
253 maximal at the posterior STG, consistent with past research<sup>15,37,38</sup>. Fig. 3e shows this pattern in  
254 single electrode HGp responses from two patients (both electrodes within the left posterior STG),  
255 with HGp changes occurring in response to visemes before phonemes. This pattern was distinct  
256 from responses in the fusiform gyrus, at which visemes evoked early HGp increases following the  
257 onset of the visual stimulus and no reliable response at any point during auditory-only trials (Fig.  
258 3f).



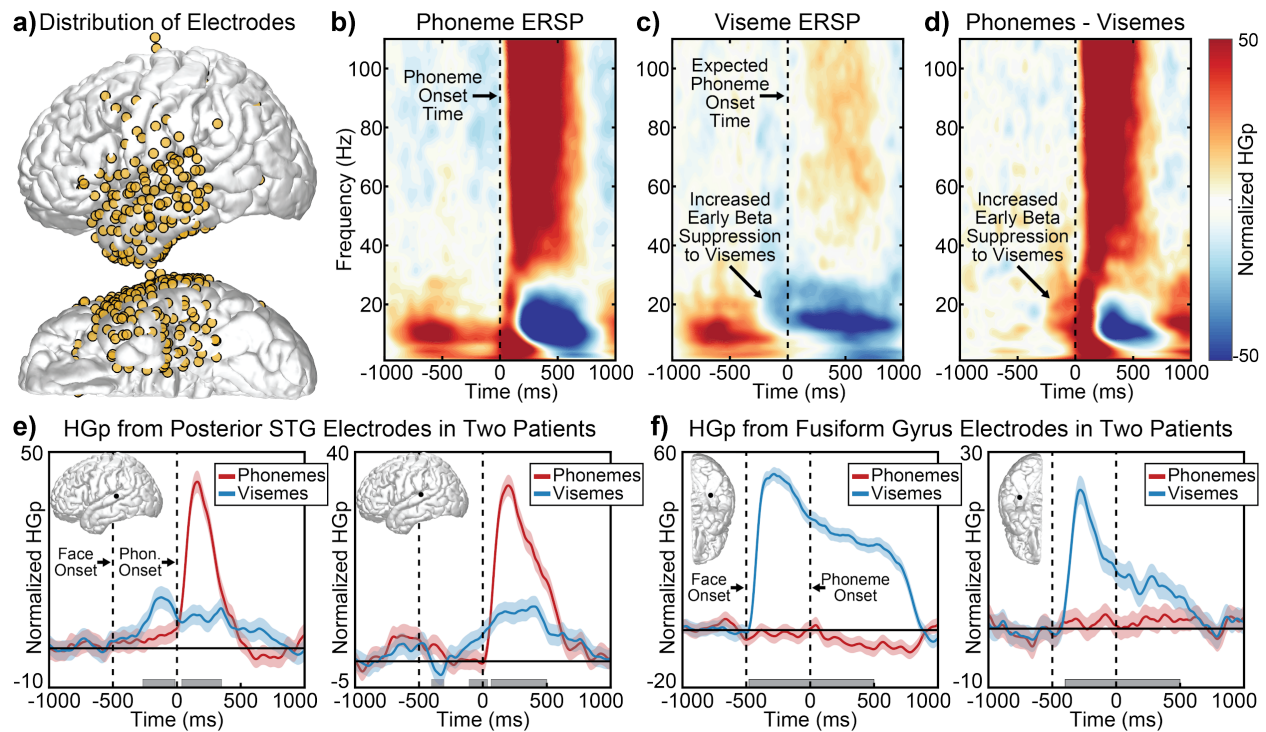

259

260 **Figure 3. iEEG results during an auditory-only (listening) and visual-only (lipreading) speech perception paradigm.** (a)  
 261 Distribution of all recorded electrodes (those beneath the pial surface not shown) ( $n = 6$  patients). (b-d) Event-related spectral  
 262 perturbations (ERSP) plots from all STG electrodes, averaged across subjects. (b) Phoneme responses peaked after sound onset  
 263 with theta and high-gamma power (HGp) increases, as well as beta suppression. (c) Viseme responses evoked maximal changes in  
 264 beta power, with increased beta suppression starting before the expected time of sound onset. (d) Difference between phoneme and  
 265 viseme ERSP plots. (e) HGp responses from two superior temporal gyrus (STG) electrodes in response to auditory-only trials  
 266 (phonemes; red lines) and visual-only trials (visemes; blue lines). Posterior STG electrodes showed increased HGp responses to  
 267 visemes before the time when speech sounds would be expected to begin. (f) HGp responses from two fusiform gyrus electrodes.  
 268 Visemes evoked increased HGp shortly after onset of the face, with elevated HGp persisted throughout the visual movement period.  
 269 Phonemes failed to evoke reliable changes in activity within the fusiform gyrus. Shaded regions reflect single condition 95%  
 270 confidence intervals. Light gray boxes show significant between condition differences (multiple comparisons corrected using FDR).

271 To examine whether viseme information is represented within auditory regions, we  
 272 decoded word information using spatial and temporal signals from iEEG electrodes. Fig. 4a shows  
 273 group-level classification accuracy for decoding the initial word consonant for auditory-only and  
 274 visual-only trials. Classification was conducted separately in each subject using SVM classifiers  
 275 on single-trial event-related potential (ERP) responses (60 per consonant-initial auditory and visual  
 276 words) using time points and electrodes as dimensions. We observed significant classification  
 277 (evaluated using binomial statistics) in all six patients for both auditory-only (all  $p < .05$ ) and  
 278 visual-only conditions (all  $p < .05$ ) (single-subject statistics shown in Supplemental Table 6).  
 279 Similarly, at the group-level we observed classification accuracy reliably above chance for both

280 auditory-only ( $t(5) = 5.39, p = .0030, d = 2.20$ ), and visual-only trials ( $t(5) = 5.57, p = .0026, d =$   
 281 2.27). We additionally observed a trend towards greater classification in auditory-only trials  
 282 relative to visual-only trials ( $t(5) = 2.08, p = .0916, d = 0.851$ ).

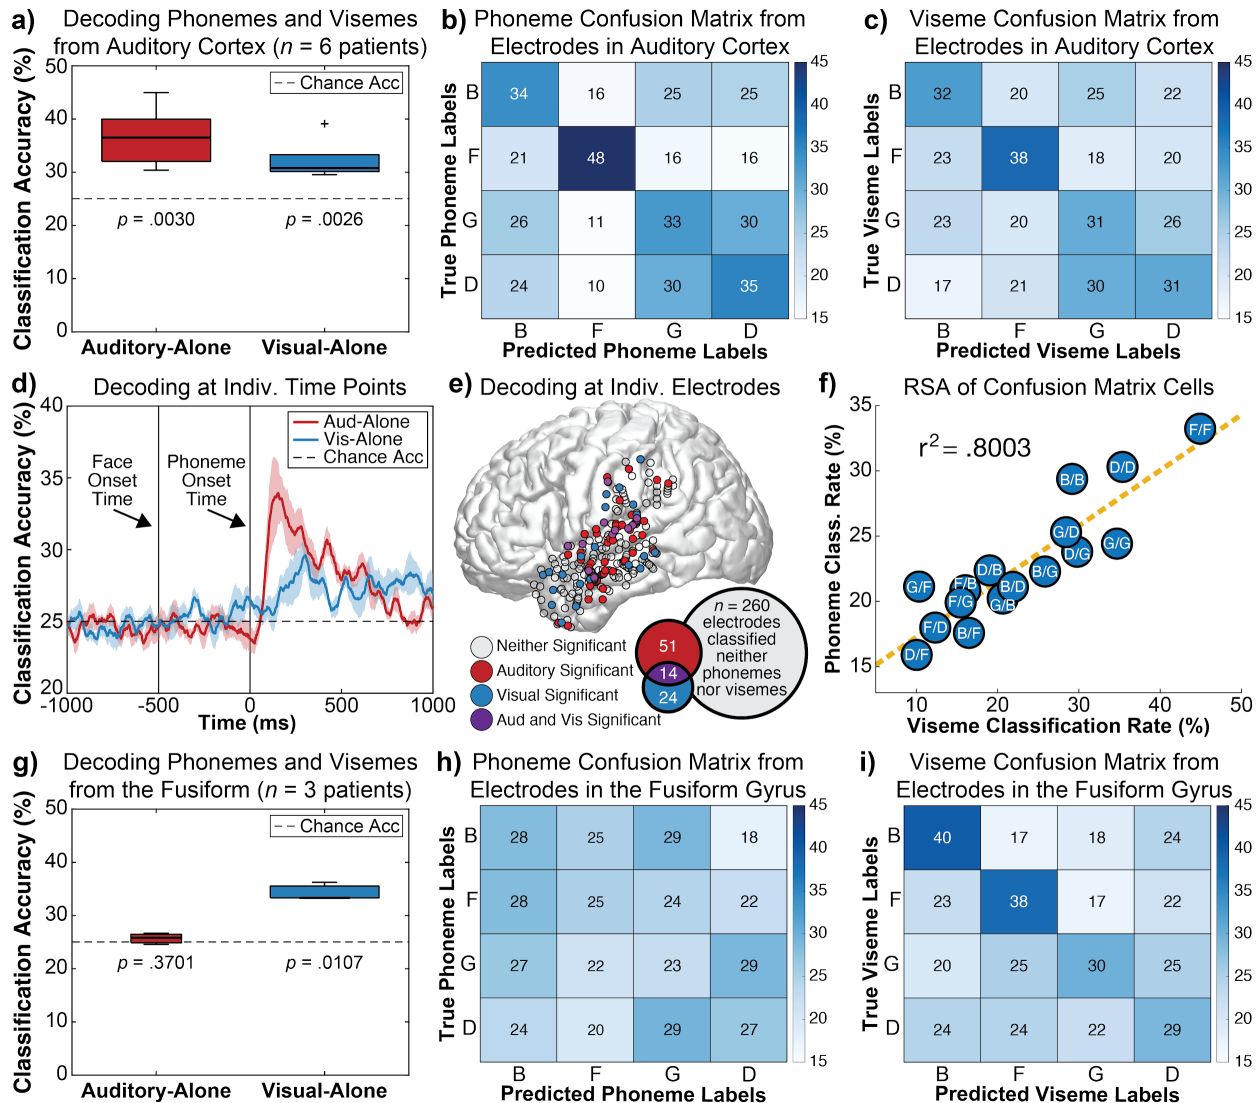

283

284 **Figure 4. iEEG classification of phoneme and viseme identities from auditory ( $n = 6$  patients) and visual ( $n = 3$  patients)**  
 285 **regions.** (a) Accuracy of an SVM classifier in identifying the correct initial consonant ('B', 'F', 'G', or 'D') from either auditory-only  
 286 or visual-only words classified at the individual-subject level from spatial and temporal iEEG information. Both visemes and  
 287 phonemes were reliably classified from auditory electrodes. Chance accuracy is 25% and plots show group-level boxplots. (b-c)  
 288 Group-averaged confusion matrices taken from 4-class auditory-only and visual-only SVM classifiers. Cells denote the frequency  
 289 at which each consonant-initial word was predicted (x-axis) relative to the true labels (y-axis). 'F' initial words were best classified  
 290 across both auditory-only and visual-only conditions, whereas 'G' and 'D' initial words were more readily confused. (d) Group-  
 291 averaged classification at individual time-points from auditory electrodes (phoneme-onset at 0 sec) showing significant  
 292 classification accuracy for both auditory-only and visual-only trials shortly after phoneme onset; in the visual-only condition, this  
 293 time-point reflected the associated speech onset time even though no auditory stimulus was presented. Shaded region reflects SEM.  
 294 (e) Spatial distribution of electrodes at which auditory-only (red) or visual-only (blue) trials were reliably classified ( $p < .05$  based  
 295 on binomial statistics); purple electrodes reflect significant classification in both conditions (with 11 out of 14 of these electrodes  
 296 present in the superior temporal gyrus) and gray electrodes reflect non-significant classification in either condition. Electrodes

297 beneath the pial surface were projected out to the lateral surface for visualization. (f) Scatterplot quantifying the similarity of  
298 classification frequency for auditory-only trials and visual-only trials from auditory electrodes (taken from 8-class classifier). Data  
299 reflect pairwise classification values, with the first letter reflecting the real consonant label and the second letter the predicted  
300 consonant label. For example, 'F' trials were predicted correctly at high frequency for both auditory and visual trials, whereas 'D'  
301 trials were incorrectly labeled as 'F' trials infrequently across both auditory and visual trials. The high correlation ( $r^2 = .8003$ ,  $p < .001$   
302 permutation test) is consistent with the hypothesis that visual speech evokes responses targeting similar distributions of neurons to  
303 corresponding phoneme responses in the STG. (g) Group-level classification accuracy showing that responses in the fusiform gyrus  
304 can distinguish between different visemes but not phonemes. (h-i) Group-level confusion matrices for auditory-only and visual-  
305 only trials from fusiform gyrus electrodes.

306         The successful classification of phonemes and visemes indicated that auditory areas  
307 represent information about the consonant initial words for both auditory-only and visual-only  
308 speech stimuli. The diagonal of the confusion matrices (Fig. 4b-c) shows that this classification  
309 was robust for each of the four auditory-only and visual-only stimuli considered ( $p < .05$  for 3 out  
310 of 4 phonemes and 3 out of 4 visemes) (statistics shown in Supp. Table 7). Previous research has  
311 shown that local auditory responses spatially cluster according to phonetic features<sup>18</sup>; for the  
312 stimuli used here, B, G, and D form one cluster and F another. Consistent with these clusters,  
313 classification was higher for auditory words with the consonant F compared to words with the  
314 consonants B, G, or D ( $t(5) = 2.95$ ,  $p = .0319$ ,  $d = 1.20$ ); a similar trend was observed for visual-  
315 alone trials ( $t(5) = 1.80$ ,  $p = .1318$ ,  $d = 0.736$ ), consistent with perceptual ambiguity of these items  
316 in phoneme-space.

317         To examine the time-course of auditory and visual speech representations within the  
318 auditory system, we classified the identity of stimuli independently at 10 ms intervals (from -1000  
319 ms to +1000 ms after phoneme onset time). Classification was applied separately for each subject  
320 and group-level statistics were calculated across subjects (Fig. 4d). Results showed significant  
321 classification accuracy ( $p < .05$ ) for both auditory-only and visual-only trials shortly after phoneme  
322 onset, indicating that visemic information is available to the auditory system at the same perceptual  
323 stage as is phonemic information.

324         In a parallel set of analyses, we classified the identity of stimuli independently at each  
325 electrode within an auditory region (including the STG, MTG, SMG) to understand the spatial

326 distribution of phoneme and viseme classification and their overlap. Phonemes were significantly  
327 ( $p < .05$  using binomial statistics) classified from 65 out of 260 electrodes (25.0%) while visemes  
328 were significantly classified from only 38 electrodes (14.6%). This pattern is similar to the overall  
329 classification rate observed in our fMRI data, such that phonemes were classified at twice as many  
330 vertices compared to visemes within the STG. Restricted to only the STG, 14 electrodes  
331 significantly classified visemic information in total, with 11 of these also significantly classified  
332 phonemic information, highlighting the spatial overlap of these processes. Again, this is consistent  
333 with the pattern observed in our fMRI data, in which few vertices were sensitive to only visemic  
334 information.

335         Because phonemes are represented through population coded responses, misclassification  
336 can reveal information about related neural processes. For example, if the rate at which the  
337 consonant /d/ is misclassified as /g/ in both auditory-only and visual-only trials is similar, it  
338 suggests similar underlying representations. To test whether auditory cortex shows similar  
339 representations for phonemic and visemic information, we calculated a correlation between each  
340 of the phoneme-pairs across the phoneme and viseme group-averaged confusion matrices. Fig. 4f  
341 shows the scatter plot reflecting classification rate for each consonant pair. Across auditory-only  
342 and visual-only trials, classification (and misclassification) rates were highly correlated ( $r^2 =$   
343  $.8003$ ,  $p < .001$  permutation test). Significance was calculated by randomly permuting the stimulus  
344 labels of each trial and repeating the full classification analysis  $n = 1000$  times. This is consistent  
345 with our hypothesis that the spatiotemporal neural representation of viseme identities in the  
346 auditory areas is similar to that of phonemes.

347         Three of the six subjects had electrodes along the ventral temporal lobe (including the  
348 fusiform gyrus). To examine phoneme and viseme representations in this visual region, we

349 repeated classification on this restricted set of electrodes. Within visual electrodes, group-level  
350 classification was significantly above chance for visual-only trials ( $t(2) = 8.74, p = .0128, d = 5.05$ )  
351 but not auditory-only trials ( $t(2) = 1.15, p = .3701, d = 0.662$ ). We additionally observed greater  
352 classification in visual-only trials relative to auditory-only trials ( $t(2) = 5.29, p = .0339, d = 3.05$ ).  
353 This pattern was seen at the individual-subject level in all three subjects using binomial statistics  
354 (all  $p < .01$  for visual-only trials and all  $p > .24$  for auditory-only trials).

355         Classification of ERPs revealed robust encoding of phoneme and viseme information in  
356 the auditory system, driven by low-frequency oscillatory information (power and phase) that  
357 reflects the excitatory/inhibitory balance of local neuronal populations<sup>39</sup>. Higher frequency activity  
358 (high-gamma power; HGp), in contrast, is associated with the average rate of action potentials  
359 generated by a local population of neurons<sup>40</sup>. Across HGp from all auditory electrodes, we  
360 observed significant classification (evaluated using binomial statistics;  $p < .05$ ) in five out of six  
361 patients for auditory-only trials and three out of six patients for visual-only trials. Similarly, at the  
362 group-level we observed classification accuracy reliably above chance for both auditory-only ( $t(5)$   
363  $= 3.74, p = .013, d = 1.53$ ), and visual-only trials ( $t(5) = 3.56, p = .0162, d = 1.45$ ). We additionally  
364 observed a trend towards greater classification in auditory-only trials relative to visual-only trials  
365 ( $t(5) = 2.40, p = .0614, d = 0.981$ ). More reliable classification for low-frequency signals evoked  
366 by visemes is consistent with the fMRI finding that classification can occur in auditory regions  
367 that do not show increased firing rates in response to visual speech.

368

## 369 **Discussion**

370         Extensive research has shown that silent visual speech can modulate activity within  
371 primary auditory regions in humans<sup>13-15,23,41,42</sup>. However, multiple sources of information could be

372 contained in these visual-driven auditory responses including visual motion timing information<sup>43</sup>,  
373 visual parsing of speech rate<sup>11</sup>, visual-derived spectral information<sup>1</sup>, general effects on attention or  
374 arousal<sup>44</sup>, or viseme-to-phoneme transformations<sup>15</sup>. Here we tested the hypothesis that the  
375 identities of individual visemes are represented in the auditory system through distributed patterns  
376 of activation, and these spatial distributions match corresponding phoneme representations. Using  
377 fMRI and intracranial electrodes implanted in auditory regions we found that the auditory system  
378 reliably encodes the identity of visemes using spatially distributed activity in a similar manner to  
379 heard words. Moreover, visemes evoked spatially similar activity to matching phonemes,  
380 consistent with the hypothesis that visual speech targets corresponding phoneme representations

381       Data from both fMRI and iEEG showed reliable classification of visemes from auditory  
382 regions, maximal in the left pSTS and STG bilaterally. Visemic information is likely first encoded  
383 in the visual cortex<sup>45</sup> and then relayed to the auditory cortex. Consistent with this view we observed  
384 significant classification of visemes throughout visual regions (including early visual areas using  
385 fMRI and the fusiform gyrus using iEEG). Future functional connectivity analyses can be used to  
386 examine the paths of transmission of lipreading information from visual to auditory regions and  
387 computational analyses to examine how viseme information is transformed into phoneme or  
388 phonetically tuned features. For example, dynamic causal modelling (DCM) has previously shown  
389 that visual speech modulates auditory processing through ventral and dorsal routes<sup>46</sup>. Because  
390 auditory populations show opposing effects to visual speech (increased activity in posterior  
391 STG/STS and suppression in mid- to anterior STG) DCM may reveal discrete pathways of  
392 information transmission, such as fusiform to pSTS/pSTG connections and alternative pathways  
393 to the mid- to anterior STG.



394 Classification of iEEG data enables inferences about *when* phoneme and viseme  
395 information is available to the auditory system. This temporal resolution is necessary to understand  
396 whether visemes are used by the auditory system at the same time that auditory phonemes are  
397 processed (at the perceptual level), or if viseme representations emerge only after auditory  
398 processes are completed to support categorical decisions about what was heard. The present data  
399 showed significant classification accuracy for both auditory-only and visual-only trials shortly  
400 after phoneme onset, indicating that visemic information is available to the auditory system at the  
401 same perceptual stage as is phonemic information. It remains possible that silent visual speech can  
402 encode visemic information in the auditory system before phoneme onset in cases that visual  
403 speech precedes auditory onset<sup>25</sup>.

404 Mechanistically, we show that categorical visual speech information is likely encoded  
405 through the suppression of neural activity in mid- to anterior STG and increased activity in the  
406 posterior STG and STS. This is supported by converging evidence from iEEG and fMRI that silent  
407 visual speech evoked decreased BOLD and HGp in mid- to anterior STG regions (including  
408 primary auditory cortex), and increased BOLD and HGp in the posterior STG and STS. Despite  
409 these differences in activation, classification was observed throughout the STG and pSTS  
410 suggesting two distinct mechanisms through which visual information is used to modulate  
411 phoneme populations. In posterior activations, we suggest that silent visual speech selectively  
412 activates matching phoneme-tuned neurons in a categorical manner. Conversely, we suggest that  
413 visemes suppress activity in the STG in a targeted manner to inhibit incorrect representations in  
414 phonetically tuned neuronal populations<sup>25</sup> to indirectly refine the representation of correct phonetic  
415 features. While speculative, one possible explanation for why visemes avoid directly activating

416 matching phonetically tuned neurons is to limit the potential for crossmodal hallucinations<sup>47</sup>; i.e.,  
417 hearing speech during silent lipreading.

418         A limitation of the present work is that the small set of phonemes and visemes presented  
419 provide a limited account of the full distribution of phonemes and visemes present in English. This  
420 limitation was necessary to ensure adequate signal-to-noise ratios to enable classification of the  
421 individual phonemes and visemes, but future research can examine the full distribution of phoneme  
422 and viseme representations using more natural speech stimuli<sup>48</sup> in auditory-visual contexts using  
423 high-density intracranial electrodes. Data from such experiments would be predicted to show that  
424 phoneme tuning functions (the spatial selectivity of responses to a specific phoneme) will be more  
425 precise (narrower and more distinct from other phonemes) during auditory-visual speech compared  
426 to auditory-only speech. Moreover, we predict that phoneme and viseme spatial maps will  
427 imperfectly overlap (as the same viseme could denote ‘pet’ or ‘bet’) and that the dissimilarity in  
428 phoneme and viseme maps explain categorical shifts in perception during the McGurk effect (a  
429 perceptual illusion in which visual speech alters which phoneme is heard<sup>49</sup>).

430         In sum, the present studies support the hypothesis that silent visual speech information is  
431 represented in the auditory system for the purpose of refining phonetic and phonemic population  
432 responses, to in turn support speech perception fluency. This crucial form of information shared  
433 between auditory and visual regions likely reflects only one type of signal shared, and leaves open  
434 the possibility that other visual features (e.g., visual motion timing, visual parsing of speech rate,  
435 visual-derived spectral information) modulate auditory neurons in complementary ways to support  
436 speech perception in the natural environment.

437

438



439 **Methods**

440 **fMRI Experiment**

441 Planned analyses and sample size stopping justification for the fMRI study were pre-  
442 registered at OSF ([https://osf.io/6fzwd/?view\\_only=60484583a2bb4dcdb8e27788c7c4c373](https://osf.io/6fzwd/?view_only=60484583a2bb4dcdb8e27788c7c4c373)).  
443 Minor deviations from the pre-registered protocol are noted throughout the methods section. The  
444 study was approved by the Institutional Review Board (IRB) of the University of Michigan.

445

446 ***Subjects***

447 FMRI data was acquired from  $n = 64$  subjects ( $F = 47$ ,  $M = 17$ ) recruited from the  
448 University of Michigan's Psychology paid-subject pool (individuals who had previously expressed  
449 interest in research studies) and through word of mouth. Subjects' ages ranged from 18-32 (Mean:  
450 22.87,  $SD = 3.29$ ) and included 56 right-handed, 7 left-handed, and 1 ambidextrous individual.  
451 Written consent was obtained from each subject. subjects were paid USD \$20 per hour for their  
452 time. Data was collected from each subject in a single session lasting approximately 1 hour and 15  
453 minutes. Because power analyses using multivariate pattern analyses (MVPA) remain a challenge,  
454 we determined our sample size based on univariate power analysis (on the assumption that this  
455 would yield a minimum acceptable sample size). Sample size to detect visual-only effects was  
456 determined using data from the auditory-only condition in a preliminary sample using NeuroPower  
457 (using random field theory, cluster threshold  $p=.05$ ,  $\alpha=.05$ ,  $n=27$ ). Estimated sample sizes  
458 ranged from  $n=62$  to 64 across the pairwise phoneme comparisons (/fafa/ vs /mama/, /fafa/ vs  
459 /kaka/, and /kaka/ vs /mama/) and  $n=64$  was selected to ensure adequate power. No data from the  
460 visual-only condition was analyzed prior to submission of the pre-registration.

461

## 462 ***Tasks, Stimuli and Experimental Design***

463 We used an auditory and visual speech paradigm optimized for an event-related fMRI  
464 design. On each trial, subjects were presented with a three-alternative forced-choice task that  
465 consisted of either an auditory-only stimulus or a visual-only stimulus. Three types of phonemes;  
466 /fafa/, /kaka/ and /mama/ and three types of visemes; /fafa/, /kaka/ and /mama/ were used for this  
467 task. These specific phonemes were chosen to maximize the differentiability between the  
468 individual phonemic representations in the neuronal populations of the STG<sup>30,42</sup>. Fig. 1a shows the  
469 timing and structure of the task. Each trial for both the auditory-only and visual-only conditions  
470 lasted for 2 seconds. The auditory-only trials began with a fixation cross against a black screen,  
471 with the phonemes presented 250 ms after the appearance of the fixation cross. The visual-only  
472 trial began with the appearance of a female actor's face on the screen, with lip movements  
473 beginning 250 ms after face onset. After the presentation of each auditory-only or visual-only trial,  
474 subjects were presented with 3 options (/fa/, /ka/, and /ma/) and were instructed to press one of  
475 three associated buttons on an MRI-safe button response box.

476 The first 24 subjects were shown response choices that always appeared in the same order  
477 (/fa/, /ka/, or /ma/) with a stable mapping between response choice and button (the index finger  
478 was always used to make the response for /fa/, the middle finger for /ka/ and the ring finger for  
479 /ma/). While performing the sample size estimates for our power analysis, we saw that the stable  
480 mapping between response choices and button presses resulted in response type differentiability  
481 in the motor cortex consistent with prior evidence for motor regions encoding information about  
482 finger movements<sup>50</sup>. Hence, to counteract this effect and to negate the confounds of motor region  
483 responses during speech perception<sup>51</sup>, we altered the pre-registered protocol for the remaining 40  
484 subjects, who were shown response choices that were randomized after each trial.

485           Subjects had 1.25 seconds to respond to the answer choices. If the subject failed to register  
486 a response within 1.25 seconds, the trial was recorded as a missed response. Every trial was  
487 followed by a 5-6 second jitter period (sampled from a uniform random distribution) which acted  
488 as the intertrial interval (ITI)<sup>52</sup>. In each run, subjects completed 60 trials that were split between  
489 30 auditory-only and 30 visual-only trials, with 10 trials each for every phoneme and viseme; trial  
490 types and stimuli were randomly intermixed in each run.

491           In total, subjects completed five runs, resulting in 300 trials in total (150 phonemes, 150  
492 visemes) during the task, with each run lasting 8 minutes and 30 seconds. Psychtoolbox was used  
493 for stimulus delivery and recording timing information and subject responses. Auditory stimuli  
494 were presented using fMRI compatible Avotec headphones that had integrated earmuffs in order  
495 to achieve maximum reduction of scanner noise. The sound level of stimuli was held constant for  
496 all subjects. While presenting auditory speech stimuli in an MRI scanner can be challenging, the  
497 undegraded nature of the auditory stimuli enabled near perfect accuracy throughout the task. A  
498 mirror system reflected the visual stimuli from an LCD projector onto a mirror (width of the mirror:  
499 12cm, approximate viewing distance between eye and mirror: 15cm; width and height of the face  
500 on screen: 9cm x 12cm) located inside the magnet bore of the scanner.

501

### 502 ***Data Exclusion Criteria***

503           To ensure that subjects included in analyses demonstrated persistent attention throughout  
504 the task, we pre-registered exclusion criteria to remove subjects with behavioral accuracy rates  
505 less than 75% for either auditory-only or visual-only conditions: no subjects were excluded based  
506 on this cutoff.

507

508 ***fMRI Data Collection***

509           Subjects were scanned in a GE Discovery MR750 3.0 Tesla scanner with a Nova 32  
510 channel standard adult-sized coil (Milwaukee, WI). One high-resolution T1-weighted structural  
511 image was obtained for each subject that was used in preprocessing, flip angle = 8, FOV = 25.6  
512 mm, slice thickness = 1 mm, 256 slices. Then, for each of the five runs, functional T2\*-weighted  
513 BOLD images were obtained using a multiband gradient-echo, echo planar imaging sequence with  
514 a resolution of 2.4 x 2.4 x 2.4 mm<sup>3</sup>, TR of 800 ms and, TE of 30 ms, Flip Angle of 52, for a total  
515 of 644 3D volumes of the whole brain with a FOV of 216 mm. To account for signal saturation,  
516 the task did not start until the first 10 TRs were acquired and discarded by the scanner in each run.  
517

518 ***Data Processing***

519           fMRI data was reconstructed with realignment and fieldmap correction applied using  
520 SPM12 to each of the five T2\* runs for inhomogeneity recovery of signal in the B0 field.  
521 Physiological noise was removed using RETROICOR<sup>53</sup>. For both the univariate and multivariate  
522 analysis, preprocessing steps were completed using SPM12 (Wellcome Department of Cognitive  
523 Neurology, London, UK; <https://www.fil.ion.ucl.ac.uk/spm/software/spm12/>). We utilized The  
524 Decoding Toolbox (<https://sites.google.com/site/tdtdecodingtoolbox/>; version 3.997) for the  
525 whole-brain multivariate analyses.

526

527 ***Preprocessing***

528           Before preprocessing the functional images, SPM's display tool was used to set the origin  
529 of the anatomical volumes for each subject manually by picking the location of the anterior  
530 commissure. After this, functional volumes were reconstructed and realigned, physiological noise

531 was removed, and field map correction was applied. This was followed by slice time correction to  
532 account for acquisition time differences between slices for each of the whole brain functional  
533 volumes. This data was then co-registered to the subject's anatomical space using a 4th degree B-  
534 spline, followed by segmentation of the tissues from the anatomical image with a forward  
535 deformation field. Information generated during the segmentation process was then used to  
536 transform the co-registered functional volumes into the standard MNI anatomical space with  
537 isotropic voxel volume dimensions of 2mm. The normalized data was then spatially smoothed  
538 using a full-width half maximum (FWHM) kernel of 5mm.

539

#### 540 *Univariate Analysis*

541 We performed a univariate, contrast-based analysis of auditory-only phonemes (averaged  
542 across the 3 phonemes) and visual-only visemes (averaged across the 3 visemes) in order to  
543 identify the regions that demonstrate significantly different activation patterns across stimulus  
544 types. We utilized a canonical hemodynamic response function with event duration set to 2 seconds  
545 for each of the phonemes (AuditoryFA + AuditoryKA + AuditoryMA) and visemes VisualFA +  
546 VisualKA + VisualMA) and 5.5 seconds for the fixation periods (Fixation). Event onsets times  
547 were defined as the moment when the fixation cross (for auditory trials) or face (visual trials)  
548 appeared on the screen.

549 In the first level analysis, whole brain beta maps were generated individually for all seven  
550 conditions for each of the 64 subjects. These maps also included information from regressors for  
551 motion correction (six head movement parameters). Freesurfer's group-analysis pipeline was used  
552 for second level analyses<sup>54</sup>. Specifically, each subject's data was projected onto the cortical surface  
553 of the fsaverage subject (using the command `mris_preproc`) and smoothed using a FWHM of

554 10mm (using the command `mri_surf2surf`). General linear models were estimated with the  
555 command `mri_glmfit` separately for each hemisphere and condition, excluding motor and frontal  
556 areas due to the initial  $n = 24$  subjects with consistent phoneme-motor mappings. Significant  
557 vertices were identified at the group level using the command `mri_glmfit-sim` using a vertex level  
558 threshold of  $p < .001$  and cluster-level threshold of  $p < .05$  (estimated with 10000 permutations)  
559 to control for multiple comparisons; p-values were adjusted for separate tests of the two  
560 hemispheres.

561

### 562 *Multivariate Analysis*

563 To identify regions that reliably differentiated classes of phonemes and classes of visemes,  
564 we performed searchlight based MVPA analyses. Preprocessing steps for univariate and  
565 multivariate analyses were matched except for the normalization and smoothing, such that for the  
566 multivariate analysis, these two steps were performed after the first level analysis was completed.  
567 For the decoding analysis, we utilized The Decoding Toolbox<sup>55</sup> with a LIBSVM<sup>56</sup> based support  
568 vector machine (SVM) implementation. For each of the individual subjects, we built a SVM  
569 classifier with a cross-validation scheme for the five runs. We used these classifiers to build two  
570 separate models: one to classify between the three phonemes and the other to classify between the  
571 three visemes. The phoneme models were constructed to identify voxels that reliably decoded the  
572 identity of each of the three phonemes while the viseme models were built to identify voxels that  
573 reliably decoded the identity for each of the three visemes. These models were implemented as  
574 independent whole-brain searchlight analysis in the first level of the MVPA model. For each of  
575 the models, beta estimates were calculated and extracted from a 3-voxel radius sphere. 4 fMRI  
576 runs were used for training and 1 run for testing in an iterative manner. The searchlight center was

577 shifted through voxel-wise patterns throughout the brain to extract whole-brain accuracy maps for  
578 auditory-only and visual-only conditions. Chance-level accuracy (33.3%) was subtracted from  
579 individual subjects and conditions so that null-hypothesis values could be set to zero. Group-level  
580 analyses and multiple comparison corrections were performed using Freesurfer and matched those  
581 in the Univariate Analyses.

582

### 583 ***ROI-Based Decoding Analyses***

584       Following the whole-brain searchlight analysis, we selected five regions of interests from  
585 each hemisphere (ROI) based on results from literature<sup>23,41,42</sup>. Four ROIs (STG, pSTS, fusiform,  
586 and hMT+) were pre-registered. The fifth ROI (V1/V2) was included in the classification analyses  
587 given the strong univariate response in the visual-only condition. ROIs were identified at the  
588 individual subject level based on Freesurfer aparc-aseg labeling<sup>57</sup>. Selected labels included  
589 ‘superiortemporal’, ‘bankssts’, ‘MT\_exvivo.thresh’, the combined labels ‘FG1.mpm.vpnl’ to  
590 ‘FG4.mpm.vpnl’, and the combined labels ‘V1\_exvivo.thresh’ and ‘V2\_exvivo.thresh’. Contrast  
591 beta estimates (condition vs fixation) were extracted for each subject, stimulus (6 phonemes and  
592 visemes), block, and ROI. SVM analyses were performed at the individual subject level with  
593 models trained on n-1 blocks (leave-one-out classification) using the ‘fitcecoc’ function in  
594 MATLAB.

595

### 596 ***Multivariate Similarity Analysis***

597       We used the same data from the ROI-based decoding analyses to examine the correlation  
598 of spatial activity across the conditions within the STG. We restricted vertices to those with  
599 significant classification in both auditory-only and visual-only conditions (purple vertices in Fig.

600 2c) within the STG and calculated the correlation between vertex-wise beta estimates for phoneme  
601 and viseme pairs. At the single subject level, we then correlated the spatial distribution of STG  
602 activity across each of the 6 stimuli (3 phonemes and 3 visemes) in a pairwise manner. We  
603 averaged correlations across matching pairs (e.g., the phoneme /ma/ and the viseme /ma/) and  
604 separately mismatching pairs (e.g., the phoneme /ma/ and the visemes /ka/ and /fa/), to yield a pair  
605 of values for each subject, and then compared these values at the group level to examine whether  
606 visemes evoke similar spatial distributions of activity to the matching phoneme (e.g., that the  
607 viseme MA evokes a more similar spatial layout to the phoneme MA compared to the phoneme  
608 KA).

609

## 610 **IEEG Experiment**

611 The study was approved by the Institutional Review Boards (IRB) at the University of  
612 Michigan and Henry Ford Hospitals.

613

### 614 ***Subjects and Recordings***

615  $N = 6$  patients (2 female, 4 male) undergoing clinical evaluation using iEEG for intractable  
616 epilepsy consented to participate in this study under an institutional review board (IRB) approved  
617 protocol at the University of Michigan or Henry Ford hospital. Patients' ages ranged from 12-39  
618 years of age (mean = 29.7, std = 9.8) and 5 were right-handed (one patient self-reported to be  
619 ambidextrous). All patients were native English speakers. Clinically implanted depth electrodes (5  
620 mm center-to-center spacing) and/or subdural electrodes (10 mm center-to-center spacing) were  
621 used to acquire iEEG data from subjects. IEEG data from a total of 459 electrodes were recorded  
622 from the six subjects. The type and location of electrodes implanted were based on the clinical



623 needs of the patients. Electrodes were implanted within left auditory areas for 2 patients and right  
624 auditory areas for 4 patients. IEEG recordings were acquired at either 4096 Hz ( $n = 4$  patients) or  
625 1000 Hz ( $n = 2$  patients) due to differences in clinical amplifiers.

626

### 627 ***MRI and CT Acquisition and Processing***

628 Preoperative T1-weighted magnetic resonance imaging (MRI) and postoperative computer  
629 tomography (CT) scans were acquired for all subjects. The preoperative T1 MRI was registered to  
630 the postoperative CT using SPM12 using the ‘mutual information’ method<sup>58</sup>. The CT was not  
631 resliced or resampled. The localization of each electrode was performed using custom software<sup>59</sup>.  
632 The algorithm works by identifying and segmenting electrodes from the CT image based on gray  
633 scale intensity, and projects subdural electrodes to the dura surface using the shape of the electrode  
634 disk to counteract post-operative compression. For all subsequent analyses including  
635 reconstruction of cortical surfaces, volume segmentation and anatomical labeling, the Freesurfer  
636 image analysis suite was utilized (<http://surfer.nmr.mgh.harvard.edu><sup>60,61</sup>).

637

### 638 ***Task and Stimuli***

639 Subjects were tested at their bedside in an Epilepsy Monitoring Unit using a laptop running  
640 Psychtoolbox<sup>62</sup>. The task paradigm was adapted from a prior study<sup>63</sup> which was designed to  
641 behaviorally study multiple aspects of auditory-visual speech integration. The stimuli consisted of  
642 a female speaker who produced 40 commonly used 1-2 syllable words that each started with one  
643 of the four consonants: ‘b’, ‘f’, ‘g’, ‘d’ (10 of each). The phoneme in the second position of each  
644 of these words was generally balanced across each of the four groups. Each stimulus was recorded  
645 at a frame rate of 29.97 frames per second, and trimmed to 1100 ms in length. Further adjustments

646 were made such that the first consonantal burst of each word occurred at 500 ms during the video  
647 playback by removing leading video frames.

648 Each subject underwent two task variants using the same stimuli and task design to increase  
649 trial numbers, and to reduce classifier overfitting. Supp. Fig. 3 shows the task schematic for both  
650 variants of the task. In variant one, subjects were presented with words one at a time, in one of two  
651 main conditions: auditory-only or visual-only. Subjects then identified the initial speech sound of  
652 the presented stimulus using a button press to select one of four options shown on the computer  
653 screen. For example, on a trial with the word “*bag*”, the options presented to the subject were ‘*b*’,  
654 ‘*g*’, ‘*d*’, ‘*th*’. The paradigm included 40 trials per consonant in each main condition, such that each  
655 of the 40 words were presented 4 times in the visual-only condition and another 4 times in the  
656 auditory-only condition. This resulted in a total of 320 trials for each subject using task variant 1.  
657 The words used in our task are presented in Supplemental Table 5.

658 In task variant 2, subjects were presented with trials in one of four main conditions:  
659 auditory-only, visual-only, congruent audiovisual, or incongruent audiovisual. Task stimuli and  
660 instructions were the same as in variant 1. Variant 2 included 20 trials per consonant in each main  
661 condition. A second factor that was manipulated in this variant was the background noise level of  
662 the stimuli such that half of the words used in each condition were presented in either a low noise  
663 or a high noise context. In the low noise context, the auditory stimuli were presented as they were  
664 recorded (SNR = 32.2 dB SPL). In the high noise context, pink noise was added to reduce the  
665 signal-to-noise (SNR) ratio of the signals to -6 db SPL. In this task variant, only data from the  
666 auditory-only and visual-only conditions were included in analyses because they matched the main  
667 conditions obtained from Task variant 1. This resulted in a total of 80 auditory-only and 80 visual-  
668 only trials for each subject using task variant 2.

669 A total of 480 trials (Task variant 1: 320 trials, task variant 2: 160 trials) with 60 trials for  
670 each consonant ('b', 'g', 'd', 'f') per condition was obtained from the combined data of both task  
671 variants. Each subject received a randomized trial order. For the auditory-only condition, a gray  
672 rectangle was presented 500 ms before sound onset. Stimuli offset occurred 600 ms after sound  
673 onset time. In the visual-only condition, face onset occurred 500 ms before the time when phoneme  
674 onset would naturally occur. A wait time of 1.25 seconds was provided for the subjects to respond  
675 to each of the stimuli.

676

### 677 *IEEG Data Preprocessing*

678 Data were preprocessed using bipolar referencing, such that signals from adjacent  
679 electrodes were subtracted in a pairwise manner. This ensured that the final signals of interest were  
680 obtained from neuronal populations that provided maximal localized responses<sup>64</sup>. Analyses in  
681 auditory regions were restricted to electrodes (registered in MNI space) that were within 10 mm  
682 of the Freesurfer anatomical labels 'superiotemporal', 'middletemporal' or 'supramarginal'.  
683 Excessively noisy electrodes were removed either manually or statistically by identifying  
684 electrodes with raw signals that were 5 SD greater in comparison to all other electrodes. For  
685 complementary analyses in visual regions, electrode locations were anatomically restricted to the  
686 'inferiortemporal' and 'fusiform' labels.

687 Drift was removed from each channel (using residuals from fits to a 3rd order polynomial  
688 and high-pass filtering at 0.1 Hz). Power-line interference was removed by notch-filtering at 60  
689 Hz and its harmonics. ERPs were extracted from this minimally processed signal. HGp activity  
690 was extracted from the continuous time-series after wavelet convolution and power transformation  
691 (70-150 Hz in 5 Hz intervals, wavelet cycles = 20 at 70 Hz, and increased linearly to maintain the

692 same wavelet duration across frequencies). ERP and HGp data were segmented into 2 second  
693 epochs centered around speech onset time for a specific stimulus: trial onset was defined as the  
694 point when the initial consonant burst occurred. All data were then resampled to 1000 Hz.

695 Electrodes from both the left and right hemispheres were projected into the left hemisphere  
696 for analyses and visualization. This projection was performed by registering each subject's skull-  
697 stripped brain to the Freesurfer cvs\_avg35\_inMN152 template image through affine registration  
698 using the Freesurfer function 'mri\_robust\_register'<sup>65</sup>. Right hemisphere electrode coordinates were  
699 then reflected onto the left hemisphere across the sagittal axis.

700

### 701 *Classifiers for Calculating Decoding Accuracy*

702 A support vector machine<sup>66</sup> classifier was utilized for calculating decoding accuracy.  
703 Classifiers for stimulus trials were built for individual subjects and group-level analyses were  
704 performed by combining results from individual subjects (subject as a random effect).  
705 Classification was performed on downsampled data (10 Hz except where stated otherwise) to  
706 reduce dimensional complexity. Phonemes and visemes were classified using a 4-fold multiclass  
707 classifier from 0 to 500 ms following sound onset time (or the corresponding point in the visual  
708 movie); electrodes and time-points were treated as dimensions in the classification of individual  
709 trials. Time-series analyses were performed independently at each time-point (500 Hz) and  
710 accuracies were smoothed at the individual subject-level across 20 time points using the Matlab  
711 function 'movmean'. Electrode-level analyses were performed on individual electrodes located in  
712 auditory regions.

713

714

715 ***Similarity Analysis***

716 To test whether auditory cortex showed a similar representation for phonemic and visemic  
717 information, we examined the similarity of the phoneme and viseme confusion matrices.  
718 Specifically, we paired each of the 16 cells in the two confusion matrices and used Pearson  
719 correlation to examine their relationship. Significance was calculated by randomly permuting the  
720 stimulus labels of each trial and repeating the full classification analysis  $n = 1000$  times.

721

722 ***Calculating Individual Subject Classification Significance***

723 The four classes tested within each condition yielded chance levels of classification at 25%.  
724 To calculate significance above this chance level, we used binomial statistics for within-subject  
725 significance testing<sup>67,68</sup>. We used the ‘binocdf’ function in MATLAB for this, by considering two  
726 parameters: the number of trials, and probability of success at each instance (25%). This gives rise  
727 to a binomial chance-level probability that varies depending on the number of data points used for  
728 classification in each of the models that were built. This resulted in a chance probability of 29.58%  
729 ( $p = 0.05$ ) for a 4-class classifier with 240 trials.

730

731

732

733 **References**

- 734 1 Plass, J., Brang, D., Suzuki, S. & Grabowecy, M. Vision perceptually restores auditory  
735 spectral dynamics in speech. *Proc Natl Acad Sci U S A* **117**, 16920-16927 (2020).  
736 <https://doi.org/10.1073/pnas.2002887117>
- 737 2 Micheli, C. *et al.* Electro-corticography reveals continuous auditory and visual speech  
738 tracking in temporal and occipital cortex. *Eur J Neurosci* **51**, 1364-1376 (2020).  
739 <https://doi.org/10.1111/ejn.13992>
- 740 3 Ross, L. A., Saint-Amour, D., Leavitt, V. M., Javitt, D. C. & Foxe, J. J. Do you see what I  
741 am saying? Exploring visual enhancement of speech comprehension in noisy  
742 environments. *Cerebral cortex* **17**, 1147-1153 (2007).
- 743 4 Rosemann, S. & Thiel, C. M. Audio-visual speech processing in age-related hearing loss:  
744 Stronger integration and increased frontal lobe recruitment. *Neuroimage* **175**, 425-437  
745 (2018).
- 746 5 Aabedi, A. A. *et al.* Convergence of heteromodal lexical retrieval in the lateral prefrontal  
747 cortex. *Sci Rep* **11**, 6305 (2021). <https://doi.org/10.1038/s41598-021-85802-5>
- 748 6 Caplan, D., Gow, D. & Makris, N. Analysis of lesions by MRI in stroke patients with  
749 acoustic-phonetic processing deficits. *Neurology* **45**, 293-298 (1995).
- 750 7 Crinion, J. T., Warburton, E. A., Lambon-Ralph, M. A., Howard, D. & Wise, R. J.  
751 Listening to narrative speech after aphasic stroke: the role of the left anterior temporal lobe.  
752 *Cereb Cortex* **16**, 1116-1125 (2006). <https://doi.org/10.1093/cercor/bhj053>
- 753 8 Kraus, N. *et al.* The neural legacy of a single concussion. *Neurosci Lett* **646**, 21-23 (2017).  
754 <https://doi.org/10.1016/j.neulet.2017.03.008>
- 755 9 Thompson, E. C. *et al.* Difficulty hearing in noise: a sequela of concussion in children.  
756 *Brain Inj* **32**, 763-769 (2018). <https://doi.org/10.1080/02699052.2018.1447686>
- 757 10 Anderson, C. A., Wiggins, I. M., Kitterick, P. T. & Hartley, D. E. Adaptive benefit of cross-  
758 modal plasticity following cochlear implantation in deaf adults. *Proceedings of the*  
759 *National Academy of Sciences* **114**, 10256-10261 (2017).
- 760 11 Chandrasekaran, C., Trubanova, A., Stillitano, S., Caplier, A. & Ghazanfar, A. A. The  
761 natural statistics of audiovisual speech. *PLoS computational biology* **5**, e1000436 (2009).
- 762 12 Fisher, C. G. Confusions among visually perceived consonants. *Journal of speech and*  
763 *hearing research* **11**, 796-804 (1968).
- 764 13 Calvert, G. A. *et al.* Activation of auditory cortex during silent lipreading. *science* **276**,  
765 593-596 (1997).
- 766 14 Pekkola, J. *et al.* Primary auditory cortex activation by visual speech: an fMRI study at 3  
767 T. *Neuroreport* **16**, 125 (2005).
- 768 15 Karthik, G. *et al.* Visual speech differentially modulates beta, theta, and high gamma bands  
769 in auditory cortex. *Eur J Neurosci* **54**, 7301-7317 (2021).  
770 <https://doi.org/10.1111/ejn.15482>
- 771 16 Thézé, R., Giraud, A.-L. & Mégevand, P. The phase of cortical oscillations determines the  
772 perceptual fate of visual cues in naturalistic audiovisual speech. *Science advances* **6**,  
773 eabc6348 (2020).
- 774 17 Mégevand, P. *et al.* Crossmodal phase reset and evoked responses provide complementary  
775 mechanisms for the influence of visual speech in auditory cortex. *Journal of Neuroscience*  
776 **40**, 8530-8542 (2020).

- 777 18 Mesgarani, N., Cheung, C., Johnson, K. & Chang, E. F. Phonetic feature encoding in  
778 human superior temporal gyrus. *Science* **343**, 1006-1010 (2014).
- 779 19 Formisano, E., De Martino, F., Bonte, M. & Goebel, R. "Who" is saying "what"? Brain-  
780 based decoding of human voice and speech. *Science* **322**, 970-973 (2008).
- 781 20 Chang, E. F. *et al.* Categorical speech representation in human superior temporal gyrus.  
782 *Nat Neurosci* **13**, 1428-1432 (2010). <https://doi.org/10.1038/nn.2641>
- 783 21 Raizada, R. D., Tsao, F. M., Liu, H. M. & Kuhl, P. K. Quantifying the adequacy of neural  
784 representations for a cross-language phonetic discrimination task: prediction of individual  
785 differences. *Cereb Cortex* **20**, 1-12 (2010). <https://doi.org/10.1093/cercor/bhp076>
- 786 22 Leonard, M. K., Baud, M. O., Sjerps, M. J. & Chang, E. F. Perceptual restoration of masked  
787 speech in human cortex. *Nat Commun* **7**, 13619 (2016).  
788 <https://doi.org/10.1038/ncomms13619>
- 789 23 Beauchamp, M. S., Nath, A. R. & Pasalar, S. fMRI-guided transcranial magnetic  
790 stimulation reveals that the superior temporal sulcus is a cortical locus of the McGurk  
791 effect. *The Journal of Neuroscience* **30**, 2414-2417 (2010).
- 792 24 Plata Bello, J. *et al.* Visual inputs decrease brain activity in frontal areas during silent  
793 lipreading. *PloS one* **14**, e0223782 (2019).
- 794 25 Karas, P. J. *et al.* The visual speech head start improves perception and reduces superior  
795 temporal cortex responses to auditory speech. *Elife* **8**, e48116 (2019).  
796 <https://doi.org/10.7554/eLife.48116>
- 797 26 Blank, H. & Davis, M. H. Prediction errors but not sharpened signals simulate multivoxel  
798 fMRI patterns during speech perception. *PLoS biology* **14**, e1002577 (2016).
- 799 27 Haxby, J. V., Connolly, A. C. & Guntupalli, J. S. Decoding neural representational spaces  
800 using multivariate pattern analysis. *Annual review of neuroscience* **37**, 435-456 (2014).
- 801 28 Kilian-Hütten, N., Valente, G., Vroomen, J. & Formisano, E. Auditory cortex encodes the  
802 perceptual interpretation of ambiguous sound. *Journal of Neuroscience* **31**, 1715-1720  
803 (2011).
- 804 29 Bonte, M., Hausfeld, L., Scharke, W., Valente, G. & Formisano, E. Task-dependent  
805 decoding of speaker and vowel identity from auditory cortical response patterns. *Journal*  
806 *of Neuroscience* **34**, 4548-4557 (2014).
- 807 30 Mesgarani, N. & Chang, E. F. Selective cortical representation of attended speaker in  
808 multi-talker speech perception. *Nature* **485**, 233-236 (2012).  
809 <https://doi.org/10.1038/nature11020>
- 810 31 Makin, J. G., Moses, D. A. & Chang, E. F. Machine translation of cortical activity to text  
811 with an encoder-decoder framework. *Nature neuroscience* **23**, 575-582 (2020).
- 812 32 Kriegeskorte, N., Goebel, R. & Bandettini, P. Information-based functional brain mapping.  
813 *Proc Natl Acad Sci U S A* **103**, 3863-3868 (2006).  
814 <https://doi.org/10.1073/pnas.0600244103>
- 815 33 Arsenault, J. S. & Buchsbaum, B. R. Distributed neural representations of phonological  
816 features during speech perception. *Journal of Neuroscience* **35**, 634-642 (2015).
- 817 34 Schwartz, J.-L. & Savariaux, C. No, there is no 150 ms lead of visual speech on auditory  
818 speech, but a range of audiovisual asynchronies varying from small audio lead to large  
819 audio lag. *PLoS Computational Biology* **10**, e1003743 (2014).
- 820 35 Arnal, L. H., Morillon, B., Kell, C. A. & Giraud, A. L. Dual neural routing of visual  
821 facilitation in speech processing. *J Neurosci* **29**, 13445-13453 (2009).  
822 <https://doi.org/10.1523/JNEUROSCI.3194-09.2009>



- 823 36 Besle, J., Fort, A., Delpuech, C. & Giard, M. H. Bimodal speech: early suppressive visual  
824 effects in human auditory cortex. *European Journal of Neuroscience* **20**, 2225-2234  
825 (2004).
- 826 37 Bernstein, L. E., Jiang, J., Pantazis, D., Lu, Z.-L. & Joshi, A. Visual phonetic processing  
827 localized using speech and nonspeech face gestures in video and point-light displays.  
828 *Human Brain Mapping* **32**, 1660-1676 (2011).  
829 [https://doi.org:https://doi.org/10.1002/hbm.21139](https://doi.org/10.1002/hbm.21139)
- 830 38 Ozker, M., Schepers, I. M., Magnotti, J. F., Yoshor, D. & Beauchamp, M. S. A double  
831 dissociation between anterior and posterior superior temporal gyrus for processing  
832 audiovisual speech demonstrated by electrocorticography. *Journal of cognitive*  
833 *neuroscience* **29**, 1044-1060 (2017).
- 834 39 Gao, R., Peterson, E. J. & Voytek, B. Inferring synaptic excitation/inhibition balance from  
835 field potentials. *Neuroimage* **158**, 70-78 (2017).
- 836 40 Ray, S., Crone, N. E., Niebur, E., Franaszczuk, P. J. & Hsiao, S. S. Neural correlates of  
837 high-gamma oscillations (60–200 Hz) in macaque local field potentials and their potential  
838 implications in electrocorticography. *Journal of Neuroscience* **28**, 11526-11536 (2008).
- 839 41 Beauchamp, M. S., Argall, B. D., Bodurka, J., Duyn, J. H. & Martin, A. Unraveling  
840 multisensory integration: patchy organization within human STS multisensory cortex.  
841 *Nature neuroscience* **7**, 1190-1192 (2004).
- 842 42 Yi, H. G., Leonard, M. K. & Chang, E. F. The encoding of speech sounds in the superior  
843 temporal gyrus. *Neuron* **102**, 1096-1110 (2019).
- 844 43 McGrath, M. & Summerfield, Q. Intermodal timing relations and audio-visual speech  
845 recognition by normal-hearing adults. *The Journal of the Acoustical Society of America* **77**,  
846 678-685 (1985).
- 847 44 Schroeder, C. E., Lakatos, P., Kajikawa, Y., Partan, S. & Puce, A. Neuronal oscillations  
848 and visual amplification of speech. *Trends Cogn Sci* **12**, 106-113 (2008).  
849 [https://doi.org:10.1016/j.tics.2008.01.002](https://doi.org/10.1016/j.tics.2008.01.002)
- 850 45 Nidiffer, A. R., Cao, C. Z., O'Sullivan, A. & Lalor, E. C. A linguistic representation in the  
851 visual system underlies successful lipreading. *bioRxiv* (2021).
- 852 46 Zhang, L. & Du, Y. Lip movements enhance speech representations and effective  
853 connectivity in auditory dorsal stream. *NeuroImage*, 119311 (2022).
- 854 47 Nair, A. & Brang, D. Inducing synesthesia in non-synesthetes: Short-term visual  
855 deprivation facilitates auditory-evoked visual percepts. *Consciousness and cognition* **70**,  
856 70-79 (2019).
- 857 48 Mesgarani, N., Cheung, C., Johnson, K. & Chang, E. F. Phonetic feature encoding in  
858 human superior temporal gyrus. *Science* **343**, 1006-1010 (2014).  
859 [https://doi.org:10.1126/science.1245994](https://doi.org/10.1126/science.1245994)
- 860 49 McGurk, H. & MacDonald, J. Hearing lips and seeing voices. *Nature* **264**, 746-748 (1976).
- 861 50 Shen, G. *et al.* Decoding the individual finger movements from single-trial functional  
862 magnetic resonance imaging recordings of human brain activity. *European Journal of*  
863 *Neuroscience* **39**, 2071-2082 (2014).
- 864 51 Wilson, S. M., Saygin, A. P., Sereno, M. I. & Iacoboni, M. Listening to speech activates  
865 motor areas involved in speech production. *Nature neuroscience* **7**, 701-702 (2004).
- 866 52 Zeithamova, D., de Araujo Sanchez, M.-A. & Adke, A. Trial timing and pattern-  
867 information analyses of fMRI data. *Neuroimage* **153**, 221-231 (2017).



- 868 53 Glover, G. H., Li, T. Q. & Ress, D. Image-based method for retrospective correction of  
869 physiological motion effects in fMRI: RETROICOR. *Magnetic Resonance in Medicine: An Official Journal of the International Society for Magnetic Resonance in Medicine* **44**,  
870 162-167 (2000).  
871
- 872 54 Hagler Jr, D. J., Saygin, A. P. & Sereno, M. I. Smoothing and cluster thresholding for  
873 cortical surface-based group analysis of fMRI data. *Neuroimage* **33**, 1093-1103 (2006).  
874 55 Hebart, M. N., Görgen, K. & Haynes, J.-D. The Decoding Toolbox (TDT): a versatile  
875 software package for multivariate analyses of functional imaging data. *Frontiers in  
876 neuroinformatics* **8**, 88 (2015).
- 877 56 Chang, C.-C. & Lin, C.-J. LIBSVM: a library for support vector machines. *ACM  
878 transactions on intelligent systems and technology (TIST)* **2**, 1-27 (2011).  
879 57 Desikan, R. S. *et al.* An automated labeling system for subdividing the human cerebral  
880 cortex on MRI scans into gyral based regions of interest. *Neuroimage* **31**, 968-980 (2006).  
881 58 Viola, P. & Wells III, W. M. Alignment by maximization of mutual information.  
882 *International journal of computer vision* **24**, 137-154 (1997).  
883 59 Brang, D., Dai, Z., Zheng, W. & Towle, V. L. Registering imaged ECoG electrodes to  
884 human cortex: A geometry-based technique. *J Neurosci Methods* **273**, 64-73 (2016).  
885 <https://doi.org/10.1016/j.jneumeth.2016.08.007>
- 886 60 Dale, A. M., Fischl, B. & Sereno, M. I. Cortical surface-based analysis: I. Segmentation  
887 and surface reconstruction. *NeuroImage* **9**, 179-194 (1999).  
888 61 Fischl, B., Sereno, M. I. & Dale, A. M. Cortical surface-based analysis: II: Inflation,  
889 flattening, and a surface-based coordinate system. *NeuroImage* **9**, 195-207 (1999).  
890 62 Kleiner, M., Brainard, D. & Pelli, D. What's new in Psychtoolbox-3? (2007).  
891 63 Ross, L. A. *et al.* Impaired multisensory processing in schizophrenia: deficits in the visual  
892 enhancement of speech comprehension under noisy environmental conditions. *Schizophr  
893 Res* **97**, 173-183 (2007). <https://doi.org/10.1016/j.schres.2007.08.008>
- 894 64 Yao, D. *et al.* Which reference should we use for EEG and ERP practice? *Brain topography*  
895 **32**, 530-549 (2019).
- 896 65 Reuter, M., Rosas, H. D. & Fischl, B. Highly accurate inverse consistent registration: a  
897 robust approach. *Neuroimage* **53**, 1181-1196 (2010).  
898 66 Cortes, C. & Vapnik, V. Support-vector networks. *Machine learning* **20**, 273-297 (1995).  
899 67 Demandt, E. *et al.* Reaching movement onset-and end-related characteristics of EEG  
900 spectral power modulations. *Frontiers in neuroscience* **6**, 65 (2012).  
901 68 Combrisson, E. & Jerbi, K. Exceeding chance level by chance: The caveat of theoretical  
902 chance levels in brain signal classification and statistical assessment of decoding accuracy.  
903 *Journal of neuroscience methods* **250**, 126-136 (2015).  
904
